# Supplementary material
Source: Springer Nature journal article supplement (https://www.springermedizin.de/resource/supplementary/12916_2013_1100_MOESM3_ESM.pdf/9598454)
Supplement: MOESM3 [file 9598454]

# OCV SEB Study: Explanatory Model Interview Catalogue (EMIC)

Survey Phase: 1, Study Level: IV

Ministry of Health and Social Welfare of Zanzibar,  
in collaboration with  
World Health Organization, Geneva, and Swiss Tropical Institute, Basel

Swahili/English Version of 27/06/2008 (Final)

|                             |  |                                           |                       |
|-----------------------------|--|-------------------------------------------|-----------------------|
| Date interview (dd-mm-yyyy) |  | EMIC ID (1-X-yyy)<br>X: 1=Unguja, 2=Pemba | 1- ____ - ____ - ____ |
|-----------------------------|--|-------------------------------------------|-----------------------|

## General information

Tick appropriate:

|     |     |     |
|-----|-----|-----|
| Sex | 1 F | 2 M |
|-----|-----|-----|

|                         |  |
|-------------------------|--|
| Approximate age (years) |  |
|-------------------------|--|

Tick one only:

|          |          |         |
|----------|----------|---------|
| Site     | 1 Unguja | 2 Pemba |
| Pregnant | 1 Yes    | 2 No    |

## Introduction

“Asante kwa kukubali kuzungumza na mimi leo. Ningependa kuuliza maswali kuhusu matatizo ya kiafya, ambayo yanaweza kuathiri jamii yako. Inawezekana kwamba unayajua matatizo haya au hujawahi kuyaona. Kwa vyovyote ningependa kujua mawazo yako kuhusu swala hilo. Lakini kwanza ningependa kukuuliza maswali kuhusu maisha yako.”

*Thank you for letting me speak with you today. I will be asking you questions about health problems that could affect people in your community. You may recognise these conditions, or they may be unfamiliar. In either case I would like to understand your ideas about it. Your answers and thoughts will help us to assist people who have these problems. But first, a few questions about your background.*

## 1 Socio-economic and demographic information

### 1.1 Hali ya ndoa *Marital status*

Tick one only:

|                                                    |                                         |                                   |                                 |                                             |                                              |                                      |
|----------------------------------------------------|-----------------------------------------|-----------------------------------|---------------------------------|---------------------------------------------|----------------------------------------------|--------------------------------------|
| 1 Sijawahi kuoa au kuolewa<br><i>Never married</i> | 2 Nimeoa au nimeolewa<br><i>Married</i> | 3 Nimetengana<br><i>Separated</i> | 4 Nimeachika<br><i>Divorced</i> | 5 Tunaishi pamoja<br><i>Living together</i> | 6 Nimefilwi na mume au mke<br><i>Widowed</i> | 7 Siwezi kusema<br><i>Cannot say</i> |
|----------------------------------------------------|-----------------------------------------|-----------------------------------|---------------------------------|---------------------------------------------|----------------------------------------------|--------------------------------------|

### 1.2 Ukubwa wa nyumba *Household size*

Idadi ya watu unaishi nao *Number of people living in the household*

### 1.3 Watoto wanaoishi katika nyumba yako *Children living in the household*

Enter 0 when answer is none for a given category:

|                                               |                                       |                                     |                                       |
|-----------------------------------------------|---------------------------------------|-------------------------------------|---------------------------------------|
| Idadia ya watoto<br><i>Number of children</i> | Chini ya miaka 5<br><i>&lt; 5 yrs</i> | Miaka 5 mpaka 10<br><i>5-10 yrs</i> | Miaka 10 mpaka 17<br><i>10-17 yrs</i> |
| Wavulana Boys                                 |                                       |                                     |                                       |
| Wasichana Girls                               |                                       |                                     |                                       |

### 1.4 Uhusiano na msimamizi wa nyumba *Relationship with household head*

Tick one only:

Tick sex of household head:

|                           |                             |                           |                           |                             |                                              |
|---------------------------|-----------------------------|---------------------------|---------------------------|-----------------------------|----------------------------------------------|
| 1 Mwenyewe<br><i>Self</i> | 2 Mke/mume<br><i>Spouse</i> | 3 Wazazi<br><i>Parent</i> | 4 Ndugu<br><i>Sibling</i> | 5 Mtoto<br><i>Offspring</i> | 6 Uhusiano mwingine<br><i>Other specify:</i> |
| Sex                       | 1 F                         | 2 M                       |                           |                             |                                              |

### 1.5 Kazi au ajira *Main occupational status*

Tick one only:

|                                              |                                     |                                                      |                                                        |                                         |
|----------------------------------------------|-------------------------------------|------------------------------------------------------|--------------------------------------------------------|-----------------------------------------|
| 1 Kilimo<br><i>Agriculture</i>               | 2 Uvuvi<br><i>Fishing</i>           | 3 Nimejiiaji<br><i>Self-employment (not 1&amp;2)</i> | 4 Kuajiriwa rasmi<br><i>Formally employed</i>          | 5 Mama wa nyumbani<br><i>Housewife</i>  |
| 6 Mfanyakazi wa nyumbani<br><i>Housemaid</i> | 7 Kibarua<br><i>Casual labourer</i> | 8 Mwanafunzi<br><i>Student</i>                       | 9 Sifanji kazi/nimestaafu<br><i>Not active/retired</i> | 10 Mengine, eleza <i>Other specify:</i> |

### 1.6 Elimu *Education*

Tick highest achieved level only:

|                         |                                              |                                            |                                                 |                                           |                                        |
|-------------------------|----------------------------------------------|--------------------------------------------|-------------------------------------------------|-------------------------------------------|----------------------------------------|
| 1 Sijasoma No education | 2 Madrassa ya Koran<br><i>Koranic school</i> | 3 Elimu ya msingi<br><i>Primary school</i> | 4 Elimu ya sekondari<br><i>Secondary school</i> | 5 Elimu amali<br><i>Vocational school</i> | 6 Elimu juu<br><i>Higher education</i> |
|-------------------------|----------------------------------------------|--------------------------------------------|-------------------------------------------------|-------------------------------------------|----------------------------------------|

### 1.7 Miaka ya kusoma *Years of education*

|  |                                 |  |
|--|---------------------------------|--|
|  | Siwezi kusema <i>Cannot say</i> |  |
|--|---------------------------------|--|

### 1.8 Dini *Religion*

Tick one only:

|                   |                     |                                        |                       |
|-------------------|---------------------|----------------------------------------|-----------------------|
| 1 Mwislamu Muslim | 2 Mkristo Christian | 3 Mengine, eleza <i>Other specify:</i> | 4 Sielezi Undisclosed |
|-------------------|---------------------|----------------------------------------|-----------------------|

### 1.9 Uraia *Nationality*

Tick one only:

|                              |                                                      |
|------------------------------|------------------------------------------------------|
| 1 Mtanzania <i>Tanzanian</i> | 2 Raia wa nchi nyingine, eleza <i>Other specify:</i> |
|------------------------------|------------------------------------------------------|

### 1.10 “Kipato cha watu wanaoishi nyumbani kwako ni cha uhakika?” *Is your household income usually reliable (and dependable)?*

Tick one only, not disclosed means uncertain:

|            |                  |                          |             |
|------------|------------------|--------------------------|-------------|
| Ndio Yes 3 | Labda Possibly 2 | Hakijulikani Uncertain 1 | Hapana No 0 |
|------------|------------------|--------------------------|-------------|

Narrative: \_\_\_\_\_

\_\_\_\_\_

\_\_\_\_\_

\_\_\_\_\_

If “yes” or “possibly”, enquire further, otherwise go to Q 1.12:

### 1.11 “Ni kipi chanzo kikuu cha kipato katika nyumba yako?” *What main sources of income are there in your household?*

Narrative: \_\_\_\_\_

\_\_\_\_\_

\_\_\_\_\_

\_\_\_\_\_

Tick all that apply:

| Sources of income                                                                         | Own | Others |
|-------------------------------------------------------------------------------------------|-----|--------|
| 1 Kuajiriwa kwa mshahara <i>Employment for cash</i>                                       |     |        |
| 2 Kuajiriwa kwa namna nyingine <i>Employment in kind</i>                                  |     |        |
| 3 Kujiajiiri mwenyewe katika sekta yoyote isiyo ya kilimo <i>Non-farm self-employment</i> |     |        |
| 4 Kuuza mayao ya kilimo <i>Selling agricultural produce</i>                               |     |        |
| 5 Kuuza samaki na mazao ya baharini <i>Selling fish and seafood</i>                       |     |        |
| 6 Kukodisha (nyumba, shamba, duka) <i>Rent</i>                                            |     |        |
| 7 Msaada kututoka nje <i>Remittances (money sent from outside)</i>                        |     |        |
| 8 Pensheni <i>Pension</i>                                                                 |     |        |
| 98 Nyinginezo, eleza <i>Other specify:</i> /                                              |     |        |
| 99 Siwezi kusema <i>Cannot say</i>                                                        |     |        |

1.12 “Ni kiasi gani cha pesa umepata wewe mwenyewe mwezi uliopita? Na mume wako je? Na watu wengine wanaokaa nyumbani kwako?”

*How much money did you make during the last month on your own? And what about your spouse and other household members?*

Narrative: \_\_\_\_\_

\_\_\_\_\_

\_\_\_\_\_

Query for items not mentioned, clarify if needed. If there is no income, enter 0 in TSh column. If respondent is widowed, then tick “cannot say” for category 2:

| Monthly income                                                                    | TSh |
|-----------------------------------------------------------------------------------|-----|
| 1 Chake mwenyewe<br>Own                                                           |     |
| 2 Cha mume/mke wake<br>Spouse                                                     |     |
| 3 Cha watu wengine wanaoishi katika nyumba hii hii<br>Additional household income |     |

|                             |                          |
|-----------------------------|--------------------------|
| Siwezi kusema<br>Cannot say | <input type="checkbox"/> |
| Siwezi kusema<br>Cannot say | <input type="checkbox"/> |
| Siwezi kusema<br>Cannot say | <input type="checkbox"/> |

## Introduction to vignettes

“Nakushukuru kwa kukubali kuzungumza na mimi kuhusu matatizo ya afya yanayoweza kuathiri jamii. Sasa ningependa sana kujua maoni yako kuhusu swala hilo. Tafadhali usione haya kujieleza. Nitakusimulia hadithi mbili tofauti ya watu ambao wana matatizo maalum.”

*I appreciate your willingness to talk to me about a few health problems that affect people in your community. I want to understand how you think about it. It is your ideas that I am interested in so please don't feel shy to tell me your personal opinion. I will tell you two different stories about persons who are having a particular problem.*

## 2 Vignette A

“Sikiliza hadithi ya [mtu huyu]...” *Let me tell you the story about this [person]...*

2.1 “Maradhi haya yanaitwaje?”

*What is the name of this disease?*

Specify name, summary term or short description in his/her own words. If ‘other’, specify term and explain here:

Narrative: \_\_\_\_\_

\_\_\_\_\_

\_\_\_\_\_

| Types of diarrhoea                   |                                     |
|--------------------------------------|-------------------------------------|
| 1 Kuharisha kawaida Normal diarrhoea | 5 Kipindupindu Cholera              |
| 2 Kuharisha maji Watery diarrhoea    | 6 Mchanganyiko Multiple             |
| 3 Kuharisha marena Mucous diarrhoea  | 98 Mengineyo, eleza Other, specify: |
| 4 Kuharisha damu Bloody diarrhoea    | 99 Siwezi kusema Cannot say         |

Code the name from the above numbered list:

Use the name as identified for this disease instead of referring to disease/problem and use the name of the person mentioned in the vignette in the following questions.

2.2 “Je unaweza kufikiria dalili nyingine ambazo [mtu huyu] anaweza kuwa nazo mbali na tulizozitaja hapo juu?”

*Can you think of any other symptoms that this [person] is likely to experience besides the ones we already mentioned?*

Summarize the respondent's account of problem in his/her own words:

Spontaneous narrative: \_\_\_\_\_

\_\_\_\_\_

\_\_\_\_\_

Based on the respondent's account tick problems which are mentioned under the Spon column indicating a spontaneous response to the open-ended question above. Continue by probing for any categories not yet mentioned and tick them in the Prob column, indicating a probed response to screening. Make a cross when "no" or "cannot say" was the reply to probed categories. Shaded cells must not be probed.

| Physical symptoms                                             | Spon | Prob |                                                                    | Spon | Prob |
|---------------------------------------------------------------|------|------|--------------------------------------------------------------------|------|------|
| 1 Kusokotwa na tumbo<br><i>Abdominal cramps</i>               |      |      | 13 Kunyauka, kukauka ngozi<br><i>Skin (loose, dry, shrivelled)</i> |      |      |
| 2 Kuumwa na tumbo<br><i>Abdominal pain/discomfort</i>         |      |      | 14 Kutokuwa na hamu ya kula<br><i>Loss of appetite</i>             |      |      |
| 3 Kuumwa na misuli <i>Muscle cramps</i>                       |      |      | 15 Maumiva ya kitchwa <i>Headache</i>                              |      |      |
| 4 Kutapika <i>Vomiting</i>                                    |      |      | 16 Kichefuchefu <i>Nausea</i>                                      |      |      |
| 5 Choo kingi kupita kiasi <i>Large amounts of stool</i>       |      |      | 17 Homa <i>Fever</i>                                               |      |      |
| 6 Kuharisha mara kwa mara<br><i>Frequent passing of stool</i> |      |      | 18 Udhafu<br><i>Weakness</i>                                       |      |      |
| 7 Choo kama maji ya mchele <i>Rice water-like stool</i>       |      |      | 19 Kupaparikwa na moyo <i>Palpitations</i>                         |      |      |
| 8 Choo chenye usaha <i>Pus in stool</i>                       |      |      | 20 Fadhaisha <i>Confusion</i>                                      |      |      |
| 9 Choo chenye damu <i>Bloody stool</i>                        |      |      | 21 Kupoteza fahamu <i>Unconsciousness</i>                          |      |      |
| 10 Maumivu sehemu ya kunyea<br><i>Rectal pain</i>             |      |      | 98 Dalili nyingine mwilini<br><i>Other physical symptoms</i>       |      |      |
| 11 Kiu kali <i>Very thirsty</i>                               |      |      | 99 Siwezi kusema <i>Cannot say</i>                                 |      |      |
| 12 Macho kuingia ndani <i>Sunken eyes</i>                     |      |      |                                                                    |      |      |

Probed narrative: \_\_\_\_\_

\_\_\_\_\_

\_\_\_\_\_

If respondent has mentioned more than one category, enquire further, otherwise go to Q 2.4:

### 2.3 "Je, kati ya hizo dalili ipi inayosumbua zaidi kuliko zote?" Among all these symptoms which one do you consider the single most troubling?

Narrative: \_\_\_\_\_

\_\_\_\_\_

\_\_\_\_\_

Code the most troubling category from the above numbered list of patterns of distress:

### 2.4 "Je unafikiri maradhi haya yatamuathiri vipi [mtu huyu] kimawazo, kijamii na kiuchumi katika maisha yake ya kila siku?" How do you think that this [disease] will affect [this person] emotionally, socially and financially in his/her daily life?

Summarize the respondent's account of problem in his/her own words:

Spontaneous narrative: \_\_\_\_\_

\_\_\_\_\_

\_\_\_\_\_

Based on the respondent's account tick problems which are mentioned under the Spon column indicating a spontaneous response to the open-ended questions above. Continue by probing for any categories not yet mentioned and tick them in the Prob column, indicating a probed response to screening. Make a cross when "no" or "cannot say" was the reply to probed categories.

| Impact                                                                                            | Spon | Prob |                                                                                   | Spon | Prob |
|---------------------------------------------------------------------------------------------------|------|------|-----------------------------------------------------------------------------------|------|------|
| <i>Social impact</i>                                                                              |      |      | <i>Emotional impact</i>                                                           |      |      |
| 1 Kutengwa na watu wengine<br><i>Isolation from others</i>                                        |      |      | 6 Huzuni, kukosa raha, wasiwasi<br><i>Sadness, anxiety, worry</i>                 |      |      |
| 2 Woga wa kuambukiza wengine<br><i>Fear of infecting others</i>                                   |      |      | <i>Financial impact</i>                                                           |      |      |
| 3 Kusitisha huduma za afya<br><i>Disruption of health services</i>                                |      |      | 7 Kuongezeka kwa gharama za maisha<br><i>Costs (transportation, foods, drugs)</i> |      |      |
| 4 Kuathiri shughuli za kila siku<br><i>Interference with work/daily activities</i>                |      |      | 8 Kupoteza kipato cha familia<br><i>Loss of family income</i>                     |      |      |
| 5 Kuathiri uhusiano na watu wengine katika jamii<br><i>Interference with social relationships</i> |      |      | <i>Miscellaneous</i>                                                              |      |      |
|                                                                                                   |      |      | 98 Mengine, eleza <i>Other, specify:</i>                                          |      |      |
|                                                                                                   |      |      | 99 Siwezi kusema <i>Cannot say</i>                                                |      |      |

Probed narrative: \_\_\_\_\_  
 \_\_\_\_\_  
 \_\_\_\_\_  
 \_\_\_\_\_

If respondent has mentioned more than one category, enquire further, otherwise go to Q 2.6:

2.5 "Kati ya matatizo yaliyotajwa hapo juu, tatizo lipi haswa linasumbua zaidi kuliko yote?"  
*Which of these problems that you have mentioned do you consider the single most troubling?*

Narrative: \_\_\_\_\_  
 \_\_\_\_\_  
 \_\_\_\_\_  
 \_\_\_\_\_

Code the most troubling category from the above numbered list of impacts:

2.6 "Unaonaje ubaya wa [maradhi haya] kwa [mtu huyu]?"  
*How serious is this [disease] for [this person]?*

Tick one only:

|                                  |                                         |                                |                               |
|----------------------------------|-----------------------------------------|--------------------------------|-------------------------------|
| Mbaya sana <i>Very serious</i> 3 | Mbaya kiasi <i>Moderately serious</i> 2 | Haitabiriki <i>Uncertain</i> 1 | Si mbaya <i>Not serious</i> 0 |
|----------------------------------|-----------------------------------------|--------------------------------|-------------------------------|

Narrative: \_\_\_\_\_  
 \_\_\_\_\_  
 \_\_\_\_\_  
 \_\_\_\_\_

2.7 "Je afya ya [mtu huyu] itakuwaje ikiwa atakosa matibabu sahihi ya [maradhi haya] kutoka nje ya nyumba yake?"  
*What is the most likely health outcome of this [disease] for [this person] without appropriate treatment from outside?*

Tick one only:

|                                |                                                                      |                                                                             |                                   |                                                         |
|--------------------------------|----------------------------------------------------------------------|-----------------------------------------------------------------------------|-----------------------------------|---------------------------------------------------------|
| Kifo<br><i>Usually fatal</i> 4 | Wakati mwingine inaweza kusababisha kifo<br><i>Sometimes fatal</i> 3 | Hali mbaya sana, lakini haisababishi kifo<br><i>Serious but not fatal</i> 2 | Haitabiriki<br><i>Uncertain</i> 1 | Kupona vizuri na haraka<br><i>Full/quick recovery</i> 0 |
|--------------------------------|----------------------------------------------------------------------|-----------------------------------------------------------------------------|-----------------------------------|---------------------------------------------------------|

Narrative: \_\_\_\_\_  
 \_\_\_\_\_  
 \_\_\_\_\_  
 \_\_\_\_\_

2.8 “Je, kuna yeyote nyumbani kwako aliyewahi kupata [maradhi haya]?”  
*Have you or somebody else in your household ever had this [disease]?*

Tick one only:

|            |                        |                           |             |
|------------|------------------------|---------------------------|-------------|
| Ndio Yes 3 | Inawezekana Possibly 2 | Hakuna hakika Uncertain 1 | Hapana No 0 |
|------------|------------------------|---------------------------|-------------|

Narrative: \_\_\_\_\_  
 \_\_\_\_\_  
 \_\_\_\_\_

If yes or possibly, enquire further otherwise go to Q 2.10:

2.9 “Je, alikuwa nani?”  
*Who was that?*

Tick all that apply:

|                      |                   |                 |                   |                                 |                                                                     |                             |
|----------------------|-------------------|-----------------|-------------------|---------------------------------|---------------------------------------------------------------------|-----------------------------|
| 1 Mimi mwenyewe Self | 2 Mke/Mume Spouse | 3 Wazazi Parent | 4 Watoto Children | 5 Dada/kaka/mdogo wangu Sibling | 6 Watu wengine wanaoishi ndani ya nyumba hii Other household member | 99 Siwezi kusema Cannot say |
|----------------------|-------------------|-----------------|-------------------|---------------------------------|---------------------------------------------------------------------|-----------------------------|

Narrative: \_\_\_\_\_  
 \_\_\_\_\_  
 \_\_\_\_\_

2.10 “Je, kwa kawaida ni nani mara nyingi hupata [maradhi haya]? Akina baba au akina mama? Watu wazima au watoto? Matajiri au watu masikini?”  
*In general, who is most likely to get this [disease]? Is it men or women? Adults or children? Rich or poor people?*

Enquire about the following categories if not clear from response and tick all that apply:

|                                    |                      |                      |                     |
|------------------------------------|----------------------|----------------------|---------------------|
| <b>Jinsia Sex</b>                  | 1 Wanaume Men        | 2 Wanawake Women     | 3 Si yeyote Neither |
| <b>Umri Age</b>                    | 1 Watu wazima Adults | 2 Watoto Children    | 3 Si wowote Neither |
| <b>Hali ya maisha Social class</b> | 1 Matajiri Rich      | 2 Watu masikini Poor | 3 Si yoyote Neither |

Narrative: \_\_\_\_\_  
 \_\_\_\_\_  
 \_\_\_\_\_

2.11 “Kila mmoja wetu anaweza kueleza mambo yanayotokea kwa njia tofauti tofauti. Je unafikiria nini kimesababisha tatizo la [mtu huyu]?”  
*Each of us may explain something that happens in various ways. What do you think has caused this [person]’s problem?*

Summarize the respondent’s ideas about causes in his/her own words:

Narrative: \_\_\_\_\_  
 \_\_\_\_\_  
 \_\_\_\_\_

Based on the respondent's account tick perceived causes in the Spon column indicating a spontaneous response to the open-ended question above. Continue by probing for any category not yet mentioned and tick them in the Prob column, indicating a probed response to screening. Make a cross when "no" or "cannot say" was the reply to probed categories.

| Perceived causes                                                                       | Spon | Prob |                                          | Spon | Prob |
|----------------------------------------------------------------------------------------|------|------|------------------------------------------|------|------|
| <i>Ingestion</i>                                                                       |      |      | 8 Nzi Flies                              |      |      |
| 1 Kunywa maji machafu <i>Drinking contaminated water</i>                               |      |      | 9 Malaria                                |      |      |
| 2 Chakula ambacho hakijahifadhiwa/kimeoza <i>Unprotected/spoiled food (biological)</i> |      |      | 10 Minyoo Worms                          |      |      |
| 3 Chakula kilichokatazwa <i>Forbidden food (taboo)</i>                                 |      |      | <i>Magico-religious causes</i>           |      |      |
| 4 Kula udongo <i>Eating Soil</i>                                                       |      |      | 11 Uchawi <i>Witchcraft</i>              |      |      |
| <i>Behaviour</i>                                                                       |      |      | 12 Rehema ya Mungu <i>God's will</i>     |      |      |
| 5 Kugusa maji machafu <i>Contact with contaminated water</i>                           |      |      | <i>Miscellaneous</i>                     |      |      |
| 6 Kutoosha mikono <i>Not washing hands</i>                                             |      |      | 98 Mengine, eleza <i>Other, specify:</i> |      |      |
| <i>Environment</i>                                                                     |      |      | 99 Siwezi kusema <i>Cannot say</i>       |      |      |
| 7 Mazingira machafu <i>Dirty environment</i>                                           |      |      |                                          |      |      |

Probed narrative: \_\_\_\_\_  
 \_\_\_\_\_  
 \_\_\_\_\_  
 \_\_\_\_\_

If respondent has mentioned more than one category, enquire further, otherwise go to Q 2.13:

## 2.12 "Je, kati ya hizo sababu, ipi ni sababu kuu?"

*Which one of these causes that you have mentioned do you consider the main cause?*

Narrative: \_\_\_\_\_  
 \_\_\_\_\_  
 \_\_\_\_\_  
 \_\_\_\_\_

Code the most important category from the above numbered list of perceived causes:

## 2.13 "Je, watu humsaidia nini nyumbani [mtu] mwenye [maradhi haya] kabla ya kutafuta matibabu ya nje ya nyumbani kwao?"

*What do people do at home for a [person] with this [disease] before looking for treatment or help outside their homes?*

Summarize the respondent's account of home-based treatment in his/her own words:

Spontaneous narrative: \_\_\_\_\_  
 \_\_\_\_\_  
 \_\_\_\_\_  
 \_\_\_\_\_

Based on the respondent's account tick home-based treatment categories in the Spon column indicating a spontaneous response to the open-ended question above. Continue by probing for any home-based treatment categories not yet mentioned and tick them in the Prob column, indicating a probed response to screening. Make a cross when "no" or "cannot say" was the reply to probed categories.

| Home-based treatment                                                                             | Spon | Prob |
|--------------------------------------------------------------------------------------------------|------|------|
| 1 Kunywa maji mengi au vinywaji vingine <i>Drinking more water or liquids</i>                    |      |      |
| 2 Dawa za mitishamba (mizizi, magamba, majani) <i>Herbal treatment (roots, bark, leaves)</i>     |      |      |
| 3 Kunywa dawa za vipaketi (ORS) zinazouzwa madukani <i>Oral rehydration therapy</i>              |      |      |
| 4 Kuomba dua <i>Prayers</i>                                                                      |      |      |
| 5 Kutumia dawa za antibiotics za kujinunulia mwenyewe <i>Self-administered antibiotics/drugs</i> |      |      |
| 6 Hapana <i>Nothing</i>                                                                          |      |      |
| 98 Mengine, eleza <i>Other, specify:</i>                                                         |      |      |
| 99 Siwezi kusema <i>Cannot say</i>                                                               |      |      |

Probed narrative: \_\_\_\_\_  
 \_\_\_\_\_  
 \_\_\_\_\_  
 \_\_\_\_\_

If respondent has mentioned more than one category, enquire further, otherwise go to Q 2.15:

2.14 “Je, kati ya haya matibabu, tiba ipi inafaa zaidi kuliko yote?”

*Which one of all these things people do at home do you think is likely to be most helpful?*

Narrative: \_\_\_\_\_

Code the most helpful category from the above numbered list of home-based treatments: ☐

2.15 “[Mtu] mwenye [maradhi haya] kwa kawaida ataenda wapi kupata matibabu nje ya nyumba yake?”

*Where will this person usually go for treatment outside his/her home?*

Summarize the respondent's account of outside treatment in his/her own words:

Spontaneous narrative: \_\_\_\_\_

Based on the respondent's account tick outside treatment categories in the Spon column indicating a spontaneous response to the open-ended question above. Continue by probing for any outside treatment categories not yet mentioned and tick them in the Prob column, indicating a probed response to screening. Make a cross when “no” or “cannot say” was the reply to probed categories.

| Outside treatment                                                                                                                | Spon | Prob |
|----------------------------------------------------------------------------------------------------------------------------------|------|------|
| 1 Hospitali Health facilities                                                                                                    |      |      |
| 2 Waganga wa kienyeji Traditional healers                                                                                        |      |      |
| 3 Maduka ya madawa Pharmacy or over-the-counter drugs                                                                            |      |      |
| 4 Viongozi vya dini Faith healers (Imams, Sheikh)                                                                                |      |      |
| 5 Ushauri kutoka kwa ndugu/jamaa na marafiki wanaofanya kazi vituo vya afya<br>Informal help from health-worker, friend/relative |      |      |
| 98 Sehemu nyinginezo, eleza Other, specify:                                                                                      |      |      |
| 99 Siwezi kueleza Cannot say                                                                                                     |      |      |

Probed narrative: \_\_\_\_\_

If respondent has mentioned more than one category, enquire further, otherwise go to Q 2.17:

2.16 “Je, kati ya watu hawa wanaoombwa ushauri (na wagonjwa) yupi anafaa zaidi kuliko wote?”  
*Which one of these people they might consult do you think is most helpful?*

Narrative: \_\_\_\_\_

Code the most helpful category from the above numbered list of outside treatments: ☐

2.17 “Je, unafikiri [mtu huyu] ni vizuri asiwaambie watu wengine zaidi ya watu wa familia yake kuhusu [maradhi haya]?”

*Do you think [this person] should not disclose [this disease] beyond his/her closest family?*

Tick one only:

☐ Ndio Yes 3 ☐ Labda/mchanganyiko Possible/mixed 2 ☐ Haijulikani Uncertain 1 ☐ Hapana No 0

Narrative: \_\_\_\_\_



2.18 “Je, watu wengine wangejua habari za [mtu huyu] wangemfanya aone aibu kwa sababu ya [maradhi haya]?”

*If they knew, do you think some people might make [this person] feel ashamed or embarrassed because of [this disease]?*

Tick one only:

|            |                                     |                         |             |
|------------|-------------------------------------|-------------------------|-------------|
| Ndio Yes 3 | Labda/mchanganyiko Possible/mixed 2 | Haijulikani Uncertain 1 | Hapana No 0 |
|------------|-------------------------------------|-------------------------|-------------|

Narrative: \_\_\_\_\_

\_\_\_\_\_

\_\_\_\_\_

2.19 “Je, watu wengine wangejua kwamba ameugua [maradhi haya] ingesababisha matatizo kwa [mtu huyu]?”

*Would others finding out about [this disease] cause problems for [this person]?*

Tick one only:

|            |                                     |                         |             |
|------------|-------------------------------------|-------------------------|-------------|
| Ndio Yes 3 | Labda/mchanganyiko Possible/mixed 2 | Haijulikani Uncertain 1 | Hapana No 0 |
|------------|-------------------------------------|-------------------------|-------------|

Narrative: \_\_\_\_\_

\_\_\_\_\_

\_\_\_\_\_

2.20 “Je watu wengine wangejua kwamba ameugua [maradhi haya] ingesababisha matatizo kwa familia ya [huyu mtu]?”

*Would others finding out about [this disease] cause problems for the family of [this person]?*

Tick one only:

|            |                                     |                         |             |
|------------|-------------------------------------|-------------------------|-------------|
| Ndio Yes 3 | Labda/mchanganyiko Possible/mixed 2 | Haijulikani Uncertain 1 | Hapana No 0 |
|------------|-------------------------------------|-------------------------|-------------|

Narrative: \_\_\_\_\_

\_\_\_\_\_

\_\_\_\_\_

2.21 “Je, kuna mtu yeyote katika familia yake ambaye angewacha kumpeleka kupata matibabu kwa vile hataki watu wengine wajue kwamba [mtu huyu] ameugua [maradhi haya]?”

*Might there be someone in the household who would hesitate to bring [this person] to treatment because they did not want the [disease] to be known?*

Tick one only:

|            |                                     |                         |             |
|------------|-------------------------------------|-------------------------|-------------|
| Ndio Yes 3 | Labda/mchanganyiko Possible/mixed 2 | Haijulikani Uncertain 1 | Hapana No 0 |
|------------|-------------------------------------|-------------------------|-------------|

Narrative: \_\_\_\_\_

\_\_\_\_\_

\_\_\_\_\_

2.22 “Je, inawezekana kwamba watu wengine nje ya familia wakasaidia, wakijua kwamba [mtu huyu] ameugua [maradhi haya]?”

*Is it likely that others outside the family finding out about [this disease] would be helpful to [this person]?”*

Tick one only:

|            |                                     |                         |             |
|------------|-------------------------------------|-------------------------|-------------|
| Ndio Yes 0 | Labda/mchanganyiko Possible/mixed 1 | Haijulikani Uncertain 2 | Hapana No 3 |
|------------|-------------------------------------|-------------------------|-------------|

Narrative: \_\_\_\_\_

\_\_\_\_\_

\_\_\_\_\_

2.23 “Je, nini kitafanyika kujikinga na [maradhi haya]?”  
*What can be done to prevent this [disease]?*

Summarize the respondent's account of prevention options in his/her own words:

Spontaneous narrative: \_\_\_\_\_  
 \_\_\_\_\_  
 \_\_\_\_\_  
 \_\_\_\_\_

Based on the respondent's account tick prevention categories in the Spon column indicating a spontaneous response to the open-ended question above. Continue by probing for any prevention categories not yet mentioned and tick them in the Prob column, indicating a probed response to screening. Make a cross when “no” or “cannot say” was the reply to probed categories.

| Prevention                                                              | Spon | Prob |
|-------------------------------------------------------------------------|------|------|
| 1 Kuosha mikono <i>Wash hands</i>                                       |      |      |
| 2 Maji yaliyochemshwa au yenye dawa <i>Safe water</i>                   |      |      |
| 3 Chakula safi na salama <i>Clean/safe food</i>                         |      |      |
| 4 Utupaji na uwekaji wa takataka vizuri <i>Safe disposal of garbage</i> |      |      |
| 5 Uhifadhi wa kinyesi vizuri <i>Safe disposal of stool</i>              |      |      |
| 6 Dawa za kinga <i>Preventive drugs</i>                                 |      |      |
| 7 Chanjo <i>Vaccines</i>                                                |      |      |
| 8 Elimu ya afya <i>Health education</i>                                 |      |      |
| 98 Mengine, eleza <i>Other, specify:</i>                                |      |      |
| 99 Siwezi kusema/hapana <i>Cannot say/Nothing</i>                       |      |      |

Probed narrative: \_\_\_\_\_  
 \_\_\_\_\_  
 \_\_\_\_\_  
 \_\_\_\_\_

If respondent has mentioned more than one category, enquire further, otherwise go to Q 3.1:

2.24 “Je, kati ya hizo njia ya kujikinga na [maradhi haya], ni njia ipi inafaa zaidi kuliko zote?”  
*Which one of these ways of prevention do you think is most useful?*

Narrative: \_\_\_\_\_  
 \_\_\_\_\_  
 \_\_\_\_\_  
 \_\_\_\_\_

Code the most useful way from the above numbered list of preventive measures:

### 3 Vaccines

3.1 “Je, wewe umeshawahi kupata chanjo ya aina yoyote au mtu mwingine yeyote katika familia yako?”

*Have you or anyone in your household received any type of vaccine?*

Tick one only:

|            |                  |                          |             |
|------------|------------------|--------------------------|-------------|
| Ndio Yes 3 | Labda Possibly 2 | Hakijulikani Uncertain 1 | Hapana No 0 |
|------------|------------------|--------------------------|-------------|

Narrative: \_\_\_\_\_  
 \_\_\_\_\_  
 \_\_\_\_\_  
 \_\_\_\_\_

If “yes” or “possibly”, enquire further, otherwise go to Q 3.3:

3.2 “Nani alipata chanjo?”  
*Who got it?*

Tick all that apply:

1 Mimi mwenyewe *Self* 2 Watoto *Children* 3 Watu wazima wanaokaa nyumba hii *Adults in household*

Narrative: \_\_\_\_\_  
\_\_\_\_\_  
\_\_\_\_\_  
\_\_\_\_\_

3.3 “Je, unafikiri kutokana na uzoefu wako, chanjo husaidia?”  
*Based on your experience, do you think vaccines are generally helpful?*

Tick one only:

Ndio Yes 3 Wakati mwingine *Sometimes* 2 Hakijulikani *Uncertain* 1 Hapana No 0

Narrative: \_\_\_\_\_  
\_\_\_\_\_  
\_\_\_\_\_  
\_\_\_\_\_

3.4 “Je, unafikiri chanjo inaweza kusababisha matatizo?”  
*Do you think some vaccines are also likely to cause problems?*

Tick one only:

Ndio Yes 3 Labda *Possibly* 2 Hakijulikani *Uncertain* 1 Hapana No 0

Narrative: \_\_\_\_\_  
\_\_\_\_\_  
\_\_\_\_\_  
\_\_\_\_\_

If “yes” or “possibly”, enquire further, otherwise go to Q 3.6:

3.5 “Tafadhali nieleze zaidi kuhusu hilo.”  
*Please tell me about that.*

Tick all that apply:

| Problems caused by vaccines                                                         | Tick |
|-------------------------------------------------------------------------------------|------|
| 1 Kuvimba/maumivu sehemu iliyochomwa sindano <i>Pain/swelling at injection site</i> |      |
| 2 Homa <i>Fever</i>                                                                 |      |
| 3 Majipu/kidonda <i>Infection/abscess</i>                                           |      |
| 4 Kovu <i>Scar</i>                                                                  |      |
| 5 Mtoto kulia sana <i>Crying baby</i>                                               |      |
| 98 Mengine, eleza <i>Other, specify:</i>                                            |      |

Narrative: \_\_\_\_\_  
\_\_\_\_\_  
\_\_\_\_\_  
\_\_\_\_\_

3.6 “Ikiwa chanjo kwa ajili ya kujikinga na kipindupindu itatolewa bila ya malipo utakuwa tayari kunywa?”  
*If a vaccine that you swallow becomes available to prevent cholera, would you take it if it was made available without charge?*

Tick one only:

Ndio Yes 3 Labda *Possibly* 2 Hakijulikani *Uncertain* 1 Hapana No 0

Narrative: \_\_\_\_\_  
 \_\_\_\_\_  
 \_\_\_\_\_

If “yes” or “possibly”, enquire further, otherwise go to Q 4.1:

3.7 “Kama chanjo ya kipindupindu ingegharimu 1,000 TSh ungeitumia?”  
*If the vaccine were to cost 1,000 TSh would you still take it?*

Tick one only:

|            |                  |                          |             |
|------------|------------------|--------------------------|-------------|
| Ndio Yes 3 | Labda Possibly 2 | Hakijulikani Uncertain 1 | Hapana No 0 |
|------------|------------------|--------------------------|-------------|

Narrative: \_\_\_\_\_  
 \_\_\_\_\_  
 \_\_\_\_\_

If “yes” or “possibly”, enquire further, otherwise go to Q 4.1:

3.8 “Kama chanjo ya kipindupindu ingegharimu 5,000 TSh ungeitumia?”  
*If the vaccine were to cost 5,000 TSh would you still take it?*

Tick one only:

|            |                  |                          |             |
|------------|------------------|--------------------------|-------------|
| Ndio Yes 3 | Labda Possibly 2 | Hakijulikani Uncertain 1 | Hapana No 0 |
|------------|------------------|--------------------------|-------------|

Narrative: \_\_\_\_\_  
 \_\_\_\_\_  
 \_\_\_\_\_

If “yes” or “possibly”, enquire further, otherwise go to Q 4.1:

3.9 “Kama chanjo ya kipindupindu ingegharimu 10,000 TSh ungeitumia?”  
*If the vaccine were to cost 10,000 TSh would you still take it?*

Tick one only:

|            |                  |                          |             |
|------------|------------------|--------------------------|-------------|
| Ndio Yes 3 | Labda Possibly 2 | Hakijulikani Uncertain 1 | Hapana No 0 |
|------------|------------------|--------------------------|-------------|

Narrative: \_\_\_\_\_  
 \_\_\_\_\_  
 \_\_\_\_\_

## 4 Vignette B

“Sikiliza hadithi ya [mtu huyu]...” *Let me tell you the story about this [person]...*

4.1 “Maradhi haya yanaitwaje?”  
*What is the name of this disease?*

Specify name, summary term or short description in the respondent's own words. If ‘other’, specify term and explain here:

Narrative: \_\_\_\_\_  
 \_\_\_\_\_  
 \_\_\_\_\_

| Types of diarrhoea                          |                                            |
|---------------------------------------------|--------------------------------------------|
| 1 Kuharisha kawaida <i>Normal diarrhoea</i> | 5 Kipindupindu <i>Cholera</i>              |
| 2 Kuharisha maji <i>Watery diarrhoea</i>    | 6 Mchanganyiko <i>Multiple</i>             |
| 3 Kuharisha marena <i>Mucous diarrhoea</i>  | 98 Mengineyo, eleza <i>Other, specify:</i> |
| 4 Kuharisha damu <i>Bloody diarrhoea</i>    | 99 Siwezi kusema <i>Cannot say</i>         |

Code the name from the above numbered list:

Use the name as identified for this disease instead of referring to disease/problem and use the name of the person mentioned in the vignette in the following questions.

- 4.2 “Je unaweza kufikiria dalili nyingine ambazo [mtu huyu] anaweza kuwa nazo mbali na tulizozitaja hapo juu?”  
*Can you think of any other symptoms that this [person] is likely to experience besides the ones we already mentioned?*

Narrative: \_\_\_\_\_  
 \_\_\_\_\_  
 \_\_\_\_\_

Tick all that apply:

| Physical symptoms                                             | Tick                     |                                                                    | Tick                     |
|---------------------------------------------------------------|--------------------------|--------------------------------------------------------------------|--------------------------|
| 1 Kusokotwa na tumbo<br><i>Abdominal cramps</i>               | <input type="checkbox"/> | 13 Kunyauka, kukauka ngozi<br><i>Skin (loose, dry, shrivelled)</i> | <input type="checkbox"/> |
| 2 Kuumwa na tumbo <i>Abdominal pain/discomfort</i>            | <input type="checkbox"/> | 14 Kutokuwa na hamu ya kula <i>Loss of appetite</i>                | <input type="checkbox"/> |
| 3 Kuumwa na misuli <i>Muscle cramps</i>                       | <input type="checkbox"/> | 15 Maumiva ya kitchwa <i>Headache</i>                              | <input type="checkbox"/> |
| 4 Kutapika <i>Vomiting</i>                                    | <input type="checkbox"/> | 16 Kichefuchefu <i>Nausea</i>                                      | <input type="checkbox"/> |
| 5 Choo kingi kupita kiasi <i>Large amounts of stool</i>       | <input type="checkbox"/> | 17 Homa <i>Fever</i>                                               | <input type="checkbox"/> |
| 6 Kuharisha mara kwa mara<br><i>Frequent passing of stool</i> | <input type="checkbox"/> | 18 Udhaifu<br><i>Weakness</i>                                      | <input type="checkbox"/> |
| 7 Choo kama maji ya mchele <i>Rice water-like stool</i>       | <input type="checkbox"/> | 19 Kupaparikwa na moyo <i>Palpitations</i>                         | <input type="checkbox"/> |
| 8 Choo chenye usaha <i>Pus in stool</i>                       | <input type="checkbox"/> | 20 Fadhaisha <i>Confusion</i>                                      | <input type="checkbox"/> |
| 9 Choo chenye damu <i>Bloody stool</i>                        | <input type="checkbox"/> | 21 Kupoteza fahamu <i>Unconsciousness</i>                          | <input type="checkbox"/> |
| 10 Maumivu sehemu ya kunyea<br><i>Rectal pain</i>             | <input type="checkbox"/> | 98 Dalili nyingine mwilini<br><i>Other physical symptoms</i>       | <input type="checkbox"/> |
| 11 Kiu kali <i>Very thirsty</i>                               | <input type="checkbox"/> | 99 Siwezi kusema <i>Cannot say</i>                                 | <input type="checkbox"/> |
| 12 Macho kuingia ndani <i>Sunken eyes</i>                     | <input type="checkbox"/> |                                                                    |                          |

- 4.3 “Je unafikiri maradhi haya yatamuathiri vipi [mtu huyu] kimawazo, kijamii na kiuchumi katika maisha yake ya kila siku?”  
*How do you think that this [disease] will affect [this person] emotionally, socially and financially in his/her daily life?*

Narrative: \_\_\_\_\_  
 \_\_\_\_\_  
 \_\_\_\_\_

Tick all that apply:

| Impact                                                                                            | Tick                     |                                                                                   | Tick                     |
|---------------------------------------------------------------------------------------------------|--------------------------|-----------------------------------------------------------------------------------|--------------------------|
| <i>Social impact</i>                                                                              |                          | <i>Emotional impact</i>                                                           |                          |
| 1 Kutengwa na watu wengine<br><i>Isolation from others</i>                                        | <input type="checkbox"/> | 6 Huzuni, kukosa raha, wasiwasi<br><i>Sadness, anxiety, worry</i>                 | <input type="checkbox"/> |
| 2 Woga wa kuambukiza wengine<br><i>Fear of infecting others</i>                                   | <input type="checkbox"/> | <i>Financial impact</i>                                                           |                          |
| 3 Kusitisha huduma za afya<br><i>Disruption of health services</i>                                | <input type="checkbox"/> | 7 Kuongezeka kwa gharama za maisha<br><i>Costs (transportation, foods, drugs)</i> | <input type="checkbox"/> |
| 4 Kuathiri shughuli za kila siku<br><i>Interference with work/daily activities</i>                | <input type="checkbox"/> | 8 Kupoteza kipato cha familia<br><i>Loss of family income</i>                     | <input type="checkbox"/> |
| 5 Kuathiri uhusiano na watu wengine katika jamii<br><i>Interference with social relationships</i> | <input type="checkbox"/> | <i>Miscellaneous</i>                                                              |                          |
|                                                                                                   |                          | 98 Mengine, eleza <i>Other, specify:</i>                                          | <input type="checkbox"/> |
|                                                                                                   |                          | 99 Siwezi kusema <i>Cannot say</i>                                                | <input type="checkbox"/> |

- 4.4 “Unaonaje ubaya wa [maradhi haya] kwa [mtu huyu]?”  
*How serious is this [disease] for [this person]?*

Tick one only:

|                                  |                                         |                                |                               |
|----------------------------------|-----------------------------------------|--------------------------------|-------------------------------|
| Mbaya sana <i>Very serious</i> 3 | Mbaya kiasi <i>Moderately serious</i> 2 | Haitabiriki <i>Uncertain</i> 1 | Si mbaya <i>Not serious</i> 0 |
|----------------------------------|-----------------------------------------|--------------------------------|-------------------------------|

Narrative: \_\_\_\_\_  
 \_\_\_\_\_  
 \_\_\_\_\_  
 \_\_\_\_\_

- 4.5 “Je afya ya [mtu huyu] itakuwaje ikiwa atakosa matibabu sahihi ya [maradhi haya] kutoka nje ya nyumba yake?”  
*What is the most likely health outcome of this [disease] for [this person] without appropriate treatment from outside?*

Tick one only:

|                                |                                                                      |                                                                             |                                   |                                                         |
|--------------------------------|----------------------------------------------------------------------|-----------------------------------------------------------------------------|-----------------------------------|---------------------------------------------------------|
| Kifo<br><i>Usually fatal</i> 4 | Wakati mwingine inaweza kusababisha kifo<br><i>Sometimes fatal</i> 3 | Hali mbaya sana, lakini haisababishi kifo<br><i>Serious but not fatal</i> 2 | Haitabiriki<br><i>Uncertain</i> 1 | Kupona vizuri na haraka<br><i>Full/quick recovery</i> 0 |
|--------------------------------|----------------------------------------------------------------------|-----------------------------------------------------------------------------|-----------------------------------|---------------------------------------------------------|

Narrative: \_\_\_\_\_  
 \_\_\_\_\_  
 \_\_\_\_\_

- 4.6 “Kila mmoja wetu anaweza kueleza mambo yanayotokea kwa njia tofauti tofauti. Je unafikiria nini kimesababisha tatizo la [mtu huyu]?”  
*Each of us may explain something that happens in various ways. What do you think has caused this [person]’s problem?*

Narrative: \_\_\_\_\_  
 \_\_\_\_\_  
 \_\_\_\_\_  
 \_\_\_\_\_

Tick all that apply:

| Perceived causes                                                                       | Tick |                                          | Tick |
|----------------------------------------------------------------------------------------|------|------------------------------------------|------|
| <i>Ingestion</i>                                                                       |      | 8 Nzi Flies                              |      |
| 1 Kunywa maji machafu <i>Drinking contaminated water</i>                               |      | 9 Malaria                                |      |
| 2 Chakula ambacho hakijahifadhiwa/kimeoza <i>Unprotected/spoiled food (biological)</i> |      | 10 Minyoo Worms                          |      |
| 3 Chakula kilichokatazwa <i>Forbidden food (taboo)</i>                                 |      | <i>Magico-religious causes</i>           |      |
| 4 Kula udongo <i>Eating Soil</i>                                                       |      | 11 Uchawi <i>Witchcraft</i>              |      |
| <i>Behaviour</i>                                                                       |      | 12 Rehema ya Mungu <i>God’s will</i>     |      |
| 5 Kugusa maji machafu <i>Contact with contaminated water</i>                           |      | <i>Miscellaneous</i>                     |      |
| 6 Kutoosha mikono <i>Not washing hands</i>                                             |      | 98 Mengine, eleza <i>Other, specify:</i> |      |
| <i>Environment</i>                                                                     |      | 99 Siwezi kusema <i>Cannot say</i>       |      |
| 7 Mazingira machafu <i>Dirty environment</i>                                           |      |                                          |      |

- 4.7 “Je, watu humsaidia nini nyumbani [mtu] mwenye [maradhi haya] kabla ya kutafuta matibabu ya nje ya nyumbani kwao?”  
*What do people do at home for a [person] with this [disease] before looking for treatment or help outside their homes?*

Narrative: \_\_\_\_\_  
 \_\_\_\_\_  
 \_\_\_\_\_  
 \_\_\_\_\_

Tick all that apply:

| Home-based treatment                                                                             | Tick |
|--------------------------------------------------------------------------------------------------|------|
| 1 Kunywa maji mengi au vinywaji vingine <i>Drinking more water or liquids</i>                    |      |
| 2 Dawa za mitishamba (mizizi, magamba, majani) <i>Herbal treatment (roots, bark, leaves)</i>     |      |
| 3 Kunywa dawa za vipaketi (ORS) zinazouzwa madukani <i>Oral rehydration therapy</i>              |      |
| 4 Kuomba dua <i>Prayers</i>                                                                      |      |
| 5 Kutumia dawa za antibiotics za kujinunulia mwenyewe <i>Self-administered antibiotics/drugs</i> |      |
| 6 Hapana <i>Nothing</i>                                                                          |      |
| 98 Mengine, eleza <i>Other, specify:</i>                                                         |      |
| 99 Siwezi kusema <i>Cannot say</i>                                                               |      |

4.8 “[Mtu] mwenye [maradhi haya] kwa kawaida ataenda wapi kupata matibabu nje ya nyumba yake?”

*Where will [this person] usually go for treatment outside his/her home?*

Narrative: \_\_\_\_\_

\_\_\_\_\_

\_\_\_\_\_

\_\_\_\_\_

*Tick all that apply:*

| Outside treatment                                                                                                                | Tick |
|----------------------------------------------------------------------------------------------------------------------------------|------|
| 1 Hospitali Health facilities                                                                                                    |      |
| 2 Waganga wa kienyeji Traditional healers                                                                                        |      |
| 3 Maduka ya madawa Pharmacy or over-the-counter drugs                                                                            |      |
| 4 Viongozi vya dini Faith healers (Imams, Sheikh)                                                                                |      |
| 5 Ushauri kutoka kwa ndugu/jamaa na marafiki wanaofanya kazi vituo vya afya<br>Informal help from health-worker, friend/relative |      |
| 98 Sehemu nyinginezo, eleza Other, specify:                                                                                      |      |
| 99 Siwezi kueleza Cannot say                                                                                                     |      |

## Concluding advice from respondent

“Je, kutokana na ujuzi na uzoefu wako unaweza kuniambia zaidi kuhusu matatizo ya afya ambayo tumeyajadili au kuhusu chanjo? Maoni, ushauri na mapendekezo yanakaribishwa.”

*Is there anything else you can tell me about the health problems we have discussed or about vaccinations from your experience? Any further comments, advice or suggestions will be appreciated.*

Narrative: \_\_\_\_\_

\_\_\_\_\_

\_\_\_\_\_

|                                            |                             |
|--------------------------------------------|-----------------------------|
| Team ( <i>circle appropriate</i> )         | Unguja: A B C; Pemba: D E F |
| Interviewer (name/signature)               |                             |
| Recorder (name/signature)                  |                             |
| Controlled (date/initials)                 |                             |
| Narratives translated & typed (date)       |                             |
| 1 <sup>st</sup> Data entry (date/initials) |                             |
| 2 <sup>nd</sup> Data entry (date/initials) |                             |

## Additional comments from the interview team

*Notes concerning the participant's interest and the quality of the interview, and other noteworthy features and details of this interview:*

\_\_\_\_\_

\_\_\_\_\_

\_\_\_\_\_

\_\_\_\_\_

\_\_\_\_\_

\_\_\_\_\_
